# Supplementary material
Source: Royal Society of Chemistry journal article supplement (doi:10.1039/d6cp00896h)
Supplement: d6cp00896h1.pdf [file d6cp00896h1.pdf]

## SUPPLEMENTARY INFORMATION

# Rational Donor Placement into a Native Exciton Manifold: Cavity-Anchored Dyes Drive Sub- Picosecond Energy Transfer in Light-Harvesting Complex 2

*Ryoga Morishita,<sup>1</sup> Rio Tsuji,<sup>2</sup> Seiya Takamori,<sup>1</sup> Tetsuya Yamamoto,<sup>3</sup> Sora Ishikawa,<sup>3</sup> Risa*

*Kojima,<sup>3</sup> Masaharu Kondo,<sup>1</sup> Takeshi Yanai,<sup>2,4</sup> Kazuhiro J. Fujimoto,<sup>\*,2,4</sup> Yutaka Nagasawa,<sup>\*,3</sup>*

*Takehisa Dewa<sup>\*,1</sup>*

<sup>1</sup>Department of Life Science and Applied Chemistry, Graduate School of Engineering, Nagoya Institute of Technology, Gokiso-cho, Showa-ku, Nagoya, Aichi 466-8555, Japan

<sup>2</sup>Department of Chemistry, Graduate School of Science, Nagoya University, Furo-cho, Chikusa-ku, Nagoya, Aichi 464-8601, Japan

<sup>3</sup>College of Life Sciences, Ritsumeikan University, Kusatsu, Shiga 525-8557, Japan

<sup>4</sup>Institute of Transformative Bio-Molecules (WPI-ITbM), Nagoya University, Furo-cho, Chikusa-ku, Nagoya, Aichi 464-8601, Japan

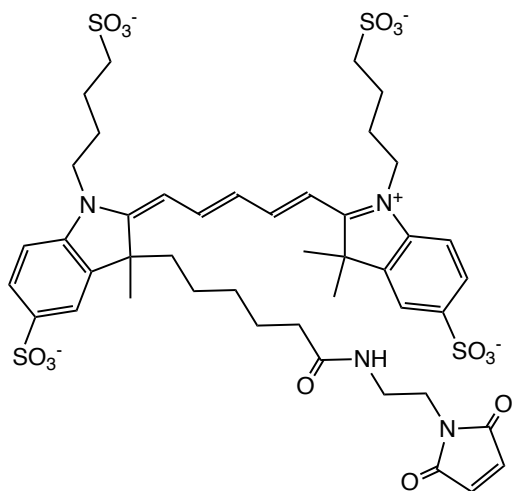

**Figure S1.** Chemical structure of Alexa647 bearing a thiol-reactive maleimide group.

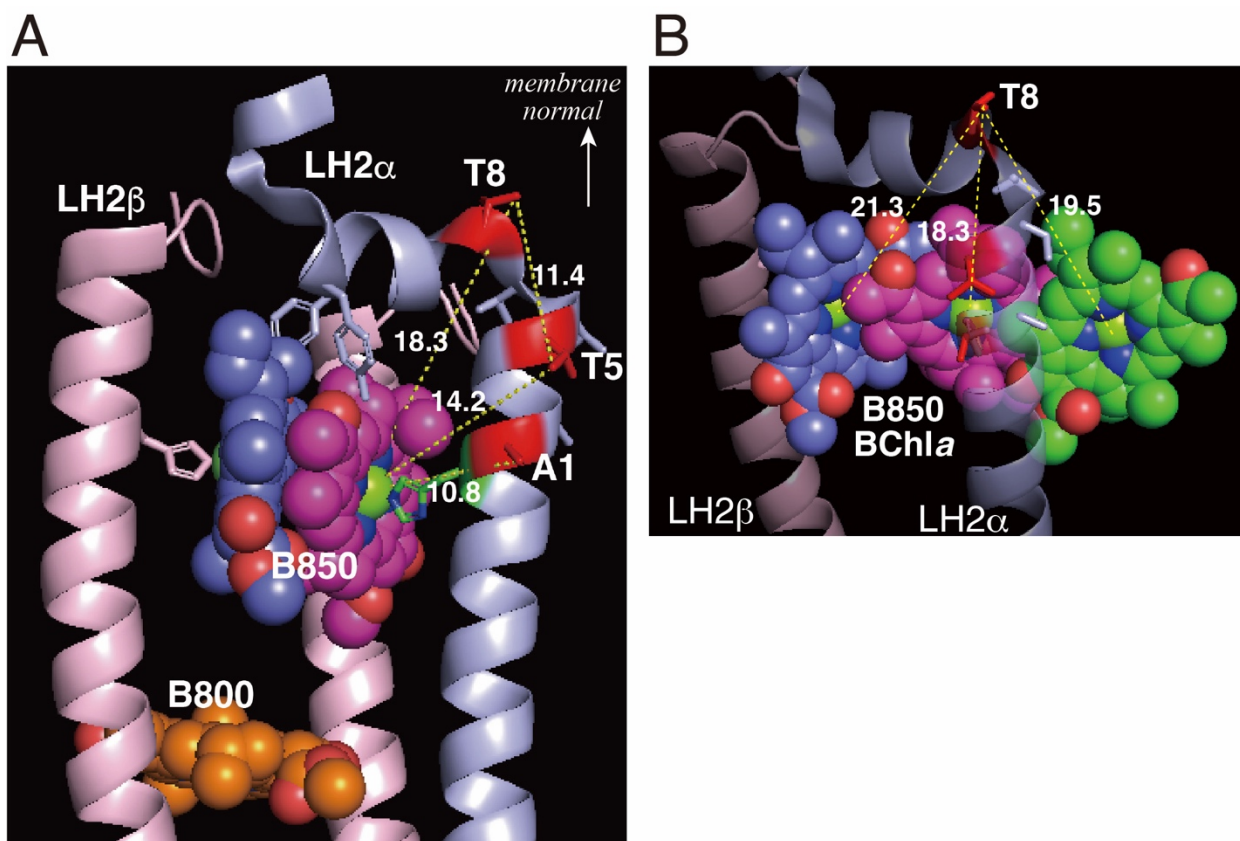

**Figure S2.** Locations of the mutation sites introduced into the LH2 $\alpha$ -polypeptide and their spatial relationships to the B850-BChla pigments. The structural model is based on the wild-type LH2 complex from *Rba. sphaeroides* 2.4.1 (PDB ID: 7PBW). The distances ( $\text{\AA}$ ) between the C $\beta$  atom of A1 or C $\gamma$  atoms of T5 and T8 and the central Mg atom of the nearest B850-BChla (A), and between the C $\gamma$  atom of T8 and Mg atoms of three proximal B850-BChlas (B) are shown. All distances were measured using PyMOL.

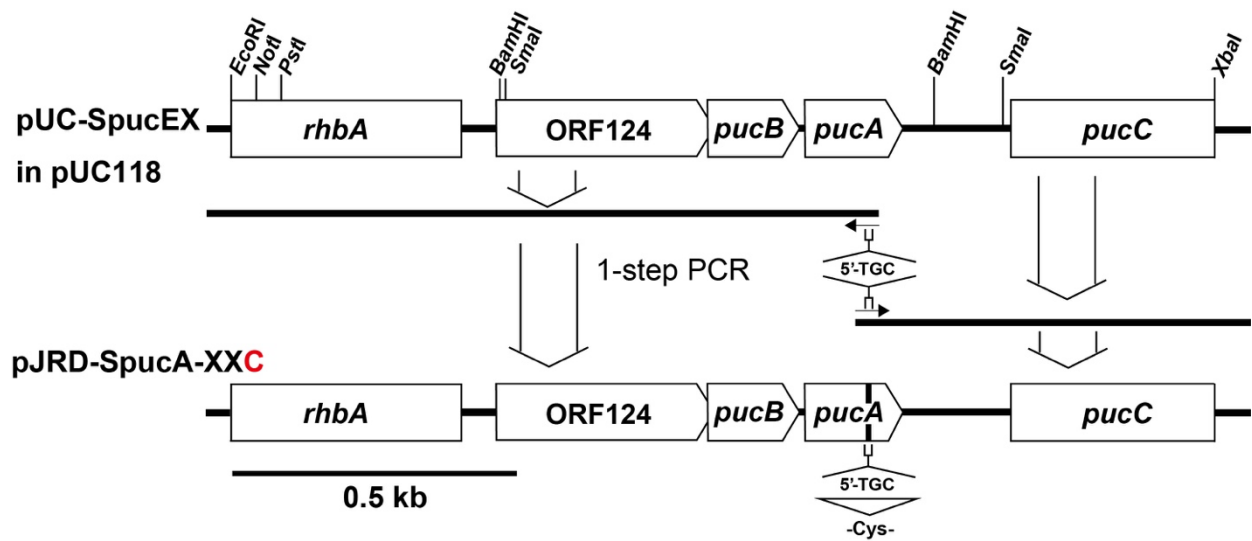

**Scheme S1.** Schematic overview of the gene manipulations performed in this study.

| <b>Table S1.</b> Primers used for the site-directed mutagenesis of the <i>pucA</i> gene and for sequencing of <i>pucBA</i> |                                             |
|----------------------------------------------------------------------------------------------------------------------------|---------------------------------------------|
| DNA primer                                                                                                                 | Sequence <sup>a)</sup>                      |
| <i>pucA</i> _A1C_F                                                                                                         | 5'-GTTCACT <u>TGCG</u> CTGTGCTGACCACCACC-3' |
| <i>pucA</i> _A1C_R                                                                                                         | 5'-CACAGCGC <u>CAGT</u> GAACCACAACCGAAGC-3' |
| <i>pucA</i> _T5C_F                                                                                                         | 5'-GTGCTGT <u>TGC</u> ACCACCACCTGGCTGCCC-3' |
| <i>pucA</i> _T5C_R                                                                                                         | 5'-GGTGGTGC <u>A</u> CAGCACAGCAGCGTGAAC-3'  |
| <i>pucA</i> _T8C_F                                                                                                         | 5'-ACCACCT <u>TGCT</u> GGCTGCCCGACTACTAC-3' |
| <i>pucA</i> _T8C_R                                                                                                         | 5'-CAGCCAGC <u>AGGT</u> GGTGGTCAGCACAGC-3'  |
| Seq_ <i>pucBA</i> _F                                                                                                       | 5'-GTCTCGTCGAAGCCCGCGTG-3'                  |
| Seq_ <i>pucBA</i> _R                                                                                                       | 5'-CAAGGATCCCGGCCTGCTCGG-3'                 |

<sup>a)</sup> Underlined nucleotides introduce the Cys substitution.

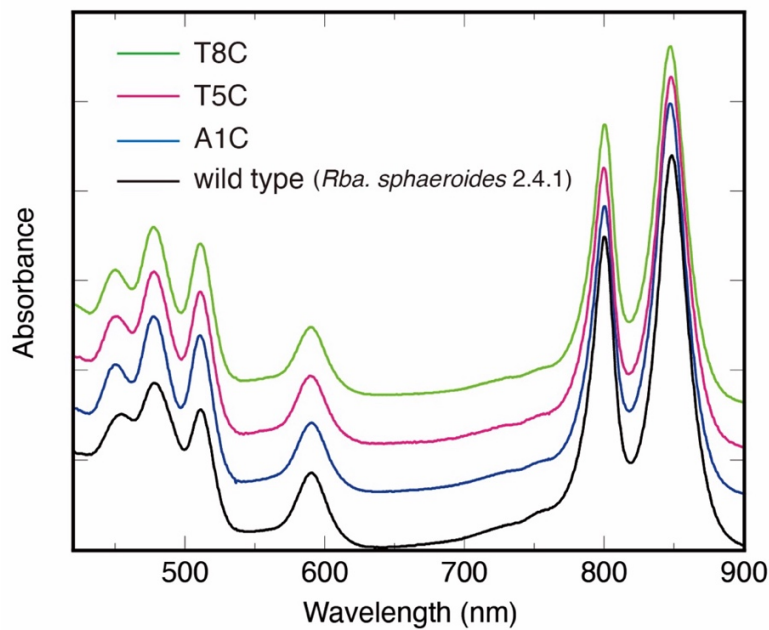

**Figure S3.** Absorption spectra of wild-type LH2 (*Rba. sphaeroides* 2.4.1; black) and LH2 mutants A1C (blue), T5C (red), and T8C (green). Samples were dissolved in Tris-HCl buffer (20 mM, pH 8.0) containing 0.02 wt %  $\beta$ -DDM.

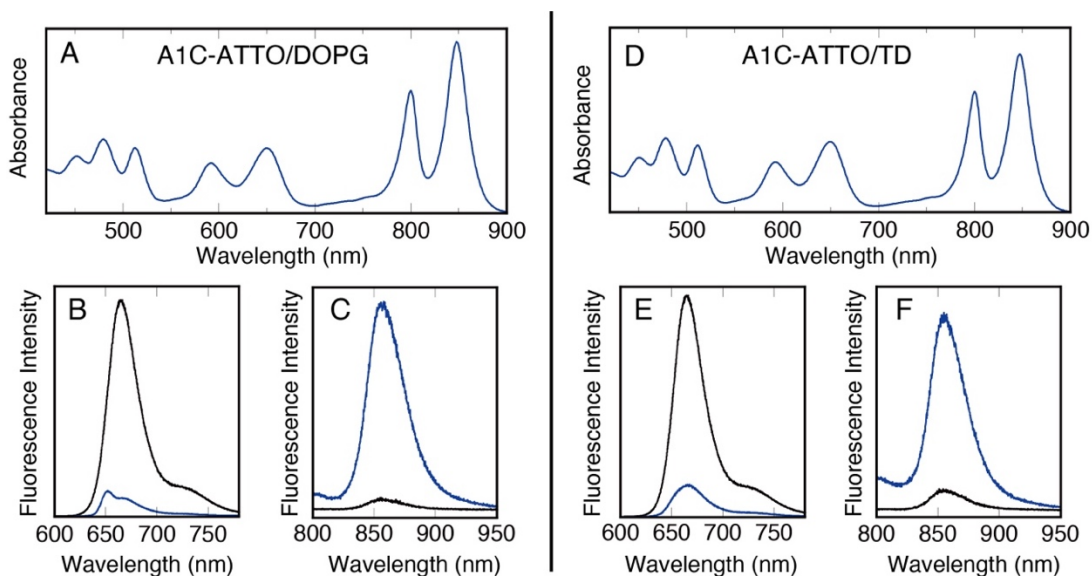

**Figure S4.** Static absorption and fluorescence spectra of A1C-ATTO in DOPG-reconstituted lipid bilayers (A–C) and in TD buffer (20 mM Tris-HCl, pH 8.0, containing 0.02 wt %  $\beta$ -DDM) (D–F). Fluorescence spectra upon excitation at 650 nm (B, C, E, and F) indicate quenching of ATTO fluorescence (B and E; blue and black traces correspond to A1C-ATTO and free ATTO at the same ATTO concentration as in A1C-ATTO, respectively) and concomitant enhancement of B850 fluorescence (C and F; blue and black traces correspond to A1C-ATTO and A1C at the same LH2 concentration as in A1C-ATTO, respectively).

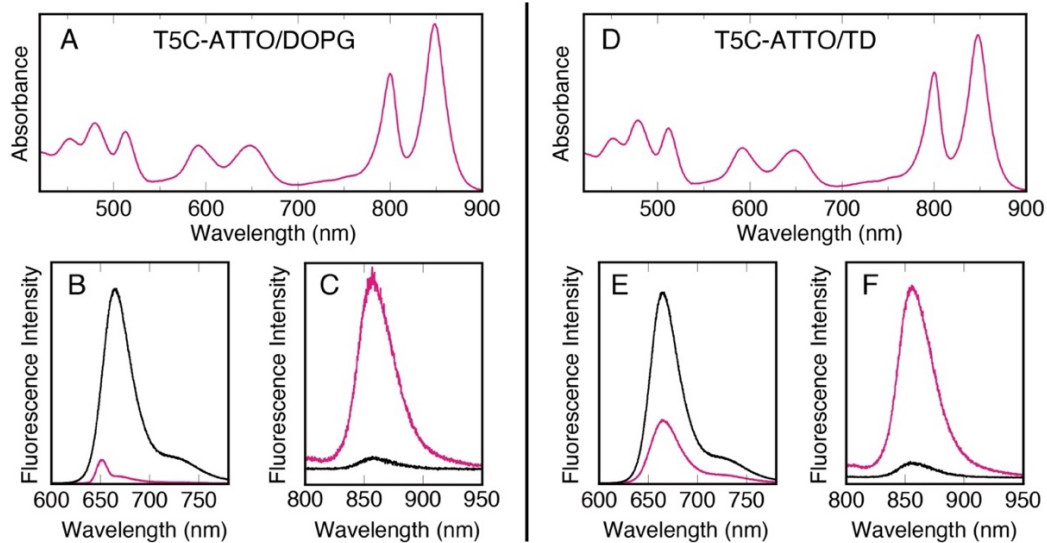

**Figure S5.** Static absorption and fluorescence spectra of T5C-ATTO in DOPG-reconstituted lipid bilayers (A–C) and in TD buffer (20 mM Tris-HCl, pH 8.0, containing 0.02 wt %  $\beta$ -DDM) (D–F). Fluorescence spectra upon excitation at 650 nm (B, C, E, and F) indicate quenching of ATTO fluorescence (B and E; blue and black traces correspond to T5C-ATTO and free ATTO at the same ATTO concentration as in T5C-ATTO, respectively) and concomitant enhancement of B850 fluorescence (C and F; blue and black traces correspond to T5C-ATTO and T5C at the same LH2 concentration as in T5C-ATTO, respectively).

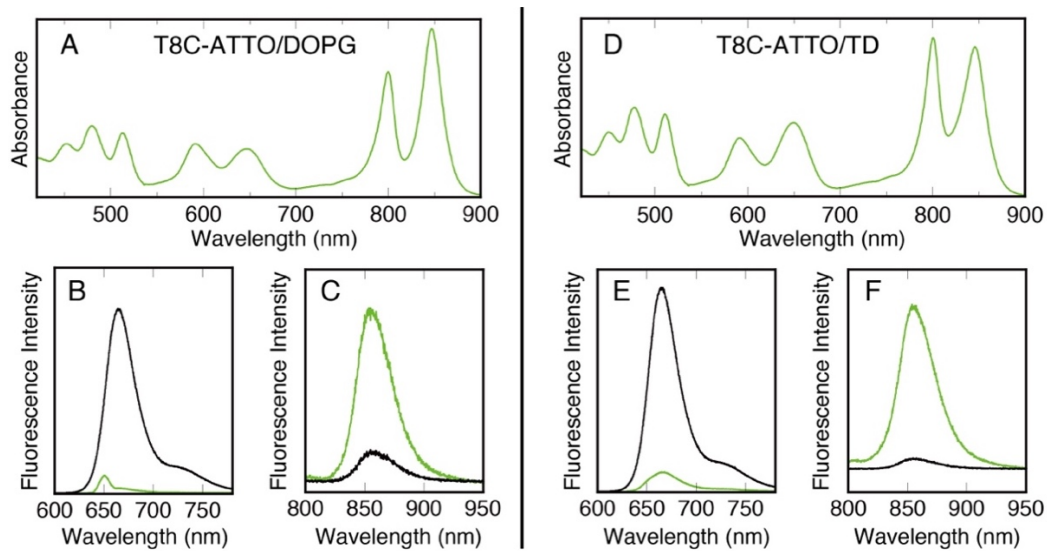

**Figure S6.** Static absorption and fluorescence spectra of T8C-ATTO in DOPG-reconstituted lipid bilayers (A–C) and in TD buffer (20 mM Tris-HCl, pH 8.0, containing 0.02 wt %  $\beta$ -DDM) (D–F). Fluorescence spectra upon excitation at 650 nm (B, C, E, and F) indicate quenching of ATTO fluorescence (B and E; blue and black traces correspond to T8C-ATTO and free ATTO at the same ATTO concentration as in T8C-ATTO, respectively) and concomitant enhancement of B850 fluorescence (C and F; blue and black traces correspond to T8C-ATTO and T8C at the same LH2 concentration as in T8C-ATTO, respectively).

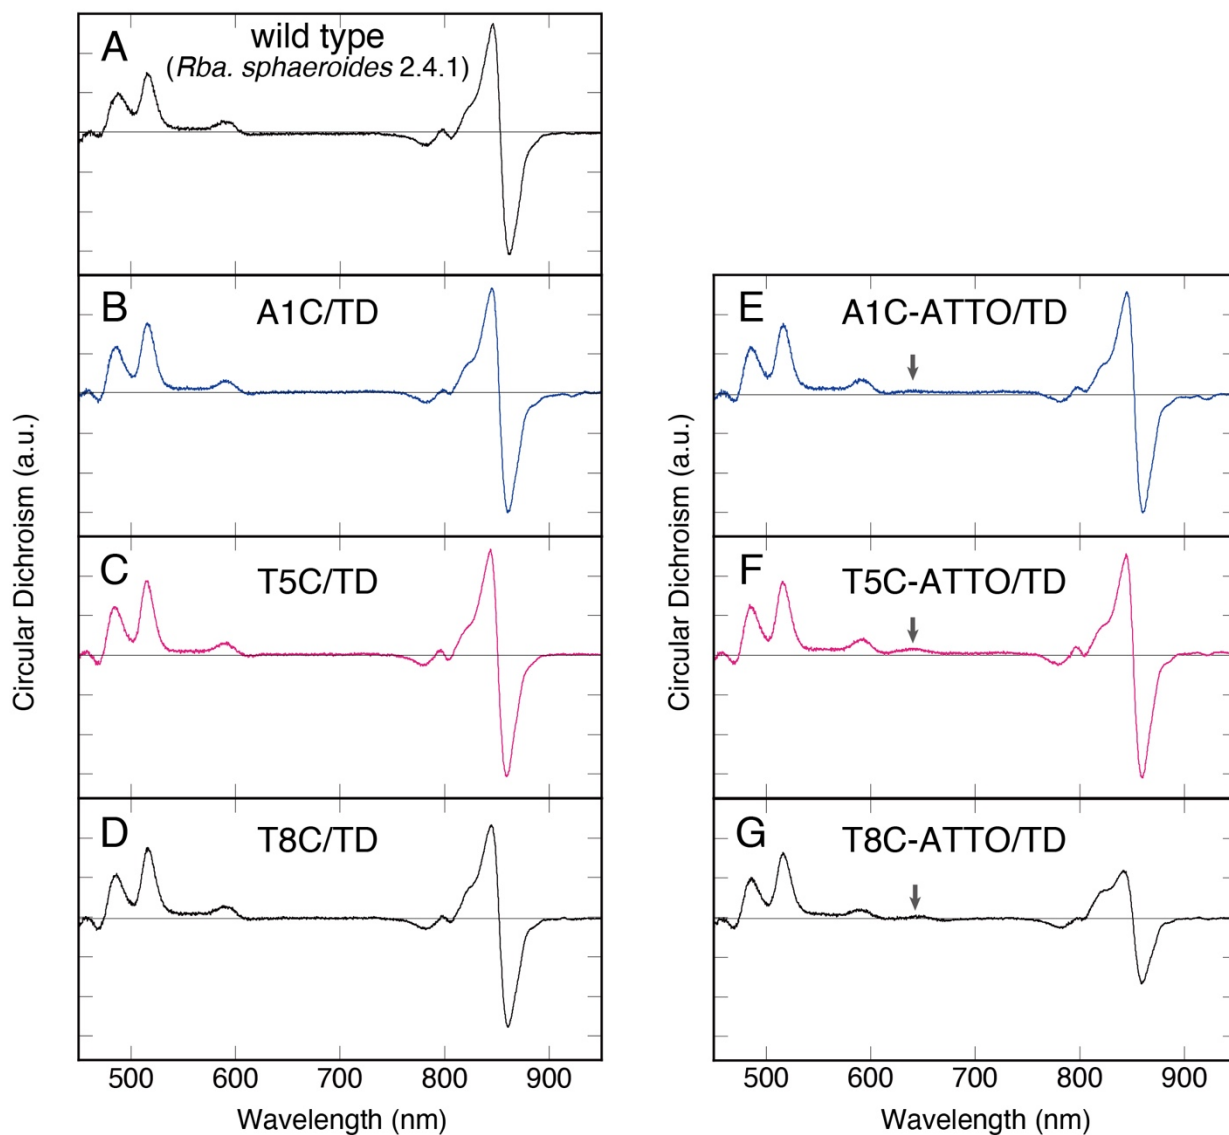

**Figure S7.** Circular dichroism spectra of LH2 complexes dissolved in TD buffer (20 mM Tris-HCl, pH 8.0, containing 0.02 wt %  $\beta$ -DDM): (A) wild-type LH2 (*Rba. sphaeroides* 2.4.1), (B) A1C, (C) T5C, (D) T8C, (E) A1C-ATTO, (F) T5C-ATTO, (G) T8C-ATTO. Arrows in panels E–G indicate a small ATTO-derived CD signal near 650 nm.

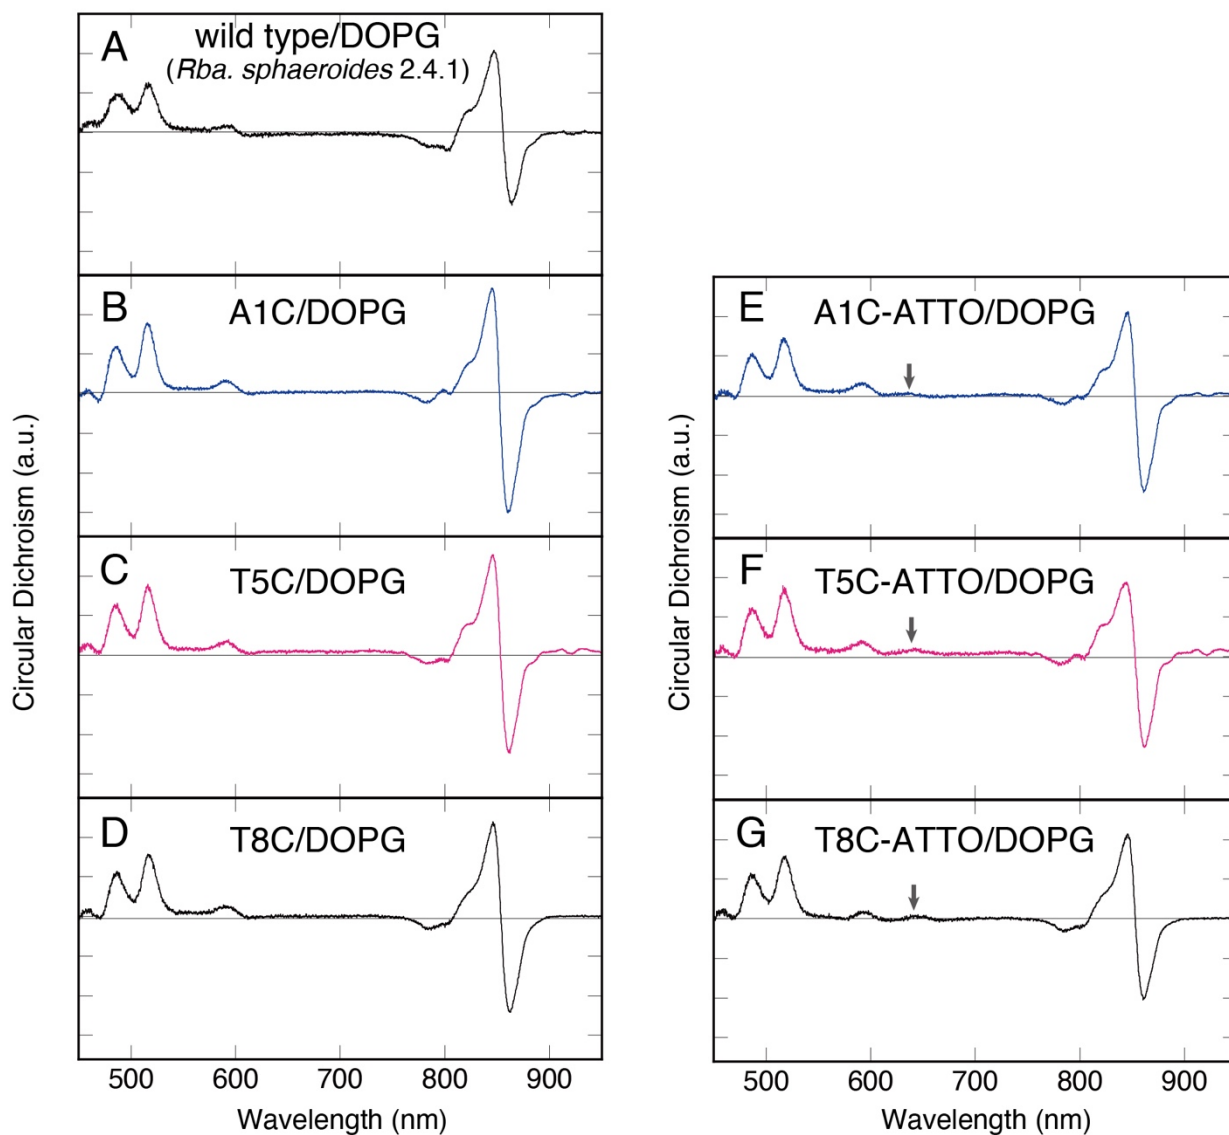

**Figure S8.** Circular dichroism spectra of LH2 complexes reconstituted into DOPG vesicles (20 mM Tris-HCl, pH 8.0): (A) wild-type LH2 (*Rba. sphaeroides* 2.4.1), (B) A1C, (C) T5C, (D) T8C, (E) A1C-ATTO, (F) T5C-ATTO, (G) T8C-ATTO. Arrows in panels E–G indicate a small ATTO-derived CD signal near 650 nm.

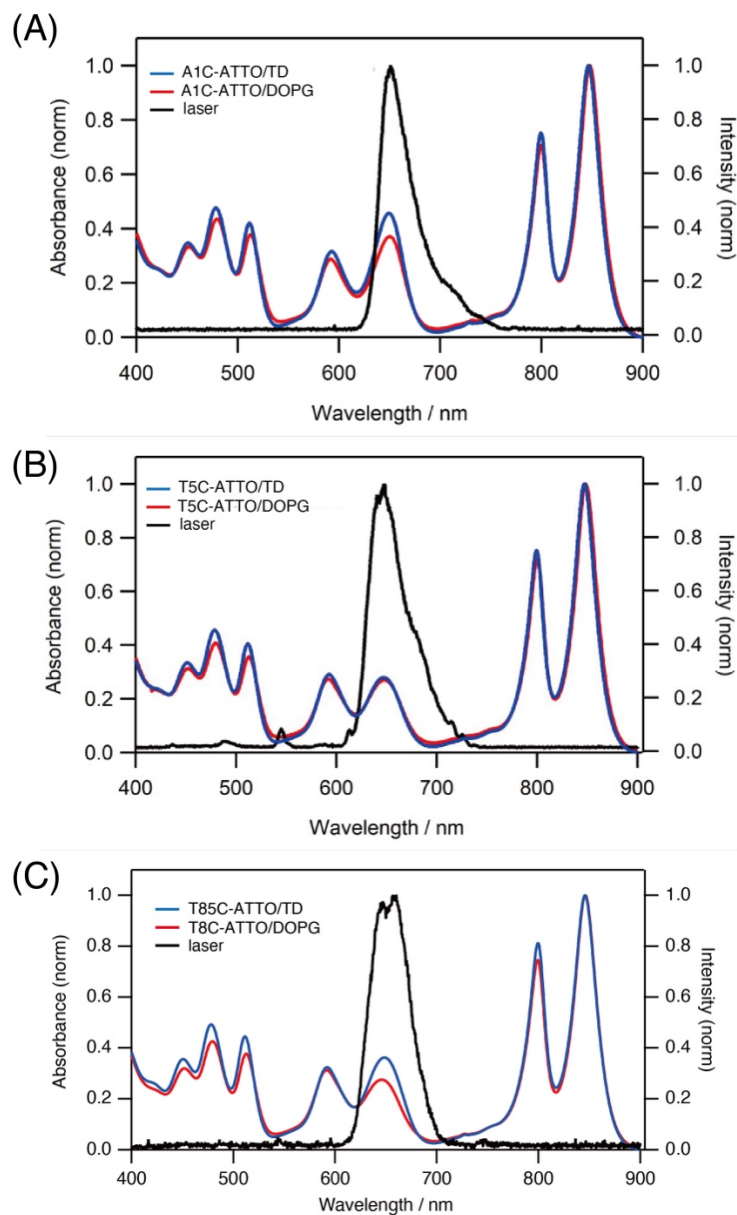

**Figure S9.** Absorption spectra of the LH2-ATTO conjugates overlaid with the excitation (pump) pulse spectra used for TA measurements: (A) A1C-ATTO, (B) T5C-ATTO, (C) T8C-ATTO. The pump pulse durations and average powers were 22 fs and 40  $\mu$ W for (A), 20 fs and 40  $\mu$ W for (B), and 19 fs and 5  $\mu$ W for (C), respectively.

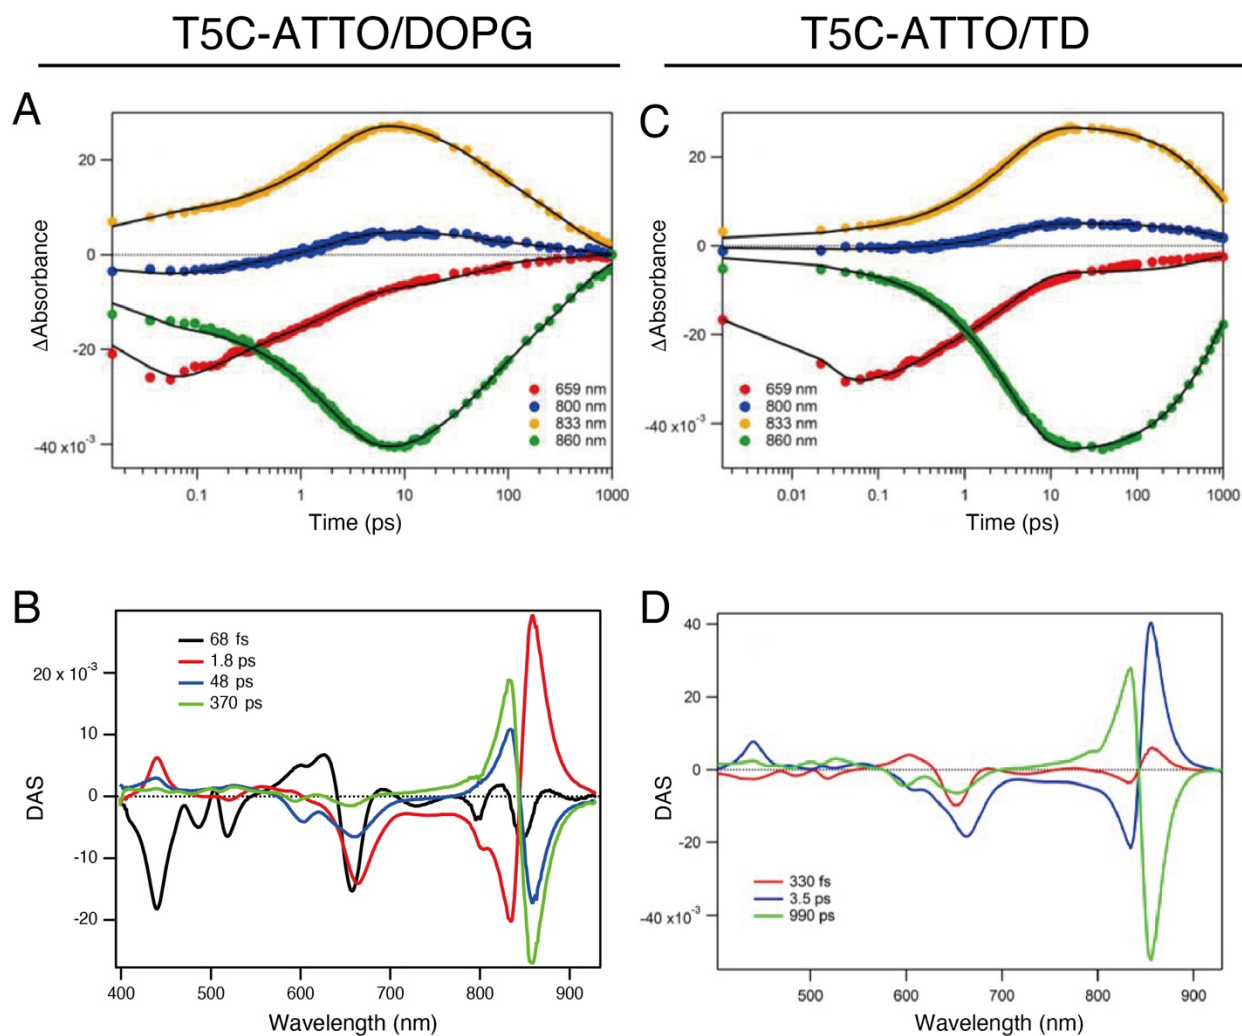

**Figure S10.** Time dependence of the  $\Delta$ Absorbance at four probe wavelengths with global fitting (A, C) and the corresponding decay-associated spectra (B, D) for T5C-ATTO/DOPG (A, B) and T5C-ATTO/TD (C, D). Excitation wavelength: 650 nm.

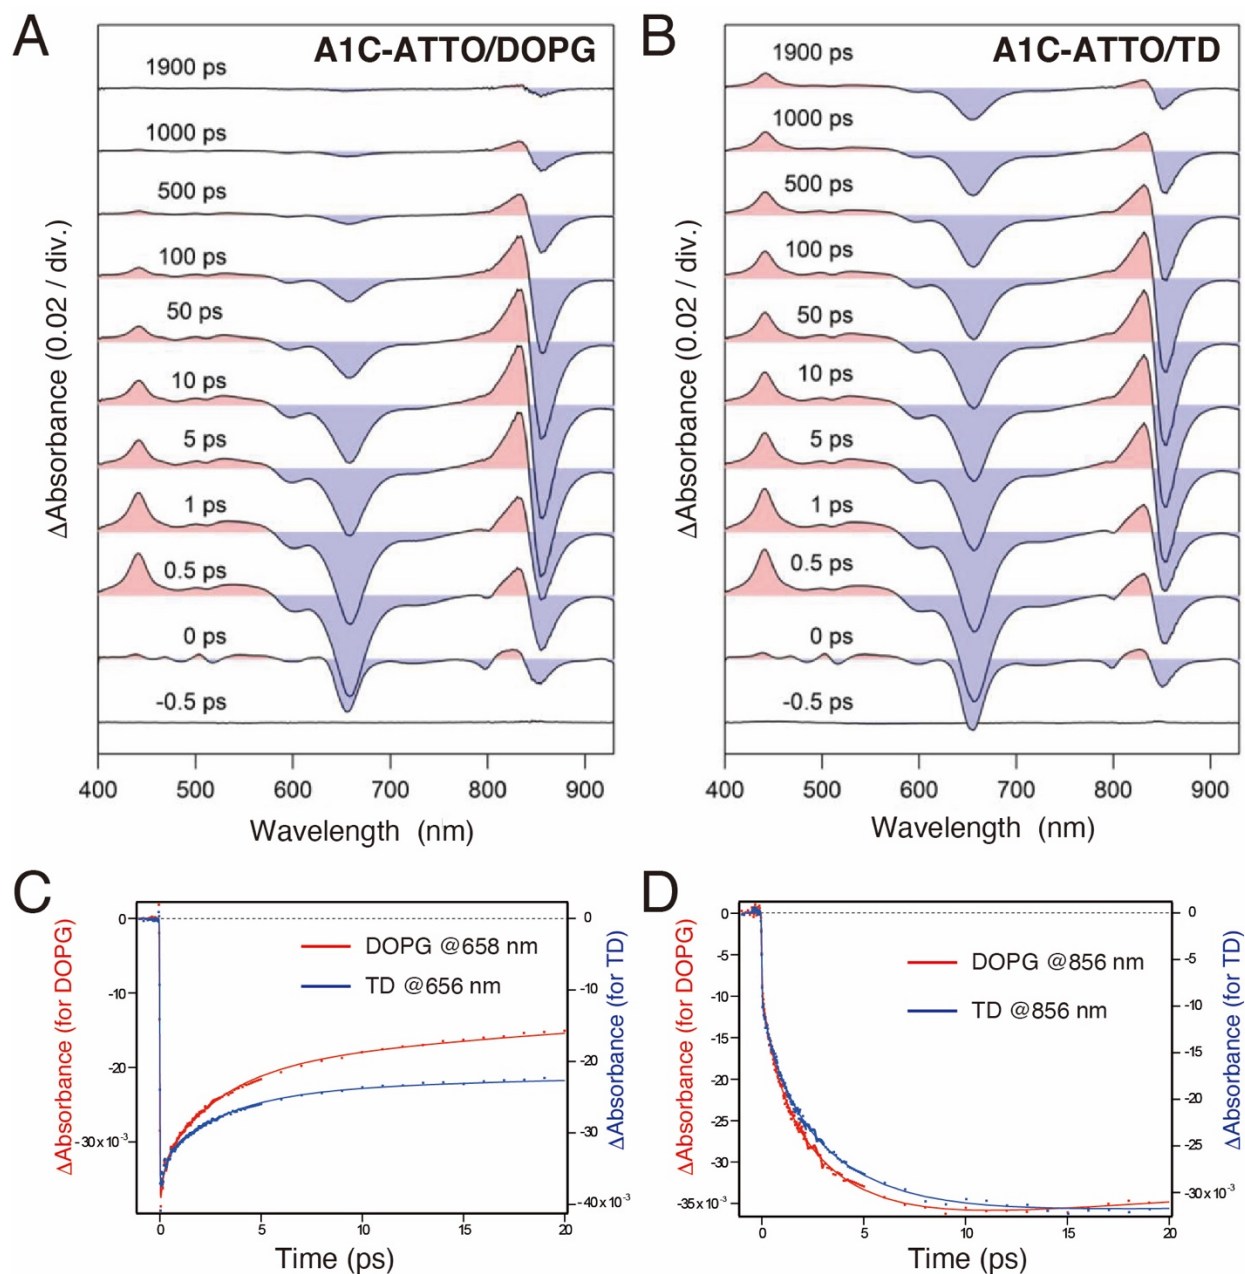

**Figure S11.** Transient absorption spectra of A1C-ATTO in DOPG-reconstituted (A, A1C-ATTO/DOPG) and detergent-solubilized (B, A1C-ATTO/TD) systems upon excitation at 650 nm. (C, D) Time dependence of  $\Delta$ Absorbance corresponding to ground state bleaching and stimulated emission of ATTO (C) and B850 (D) for the DOPG-reconstituted (red) and the detergent-solubilized (blue) systems. Fitted curves are shown as solid lines.

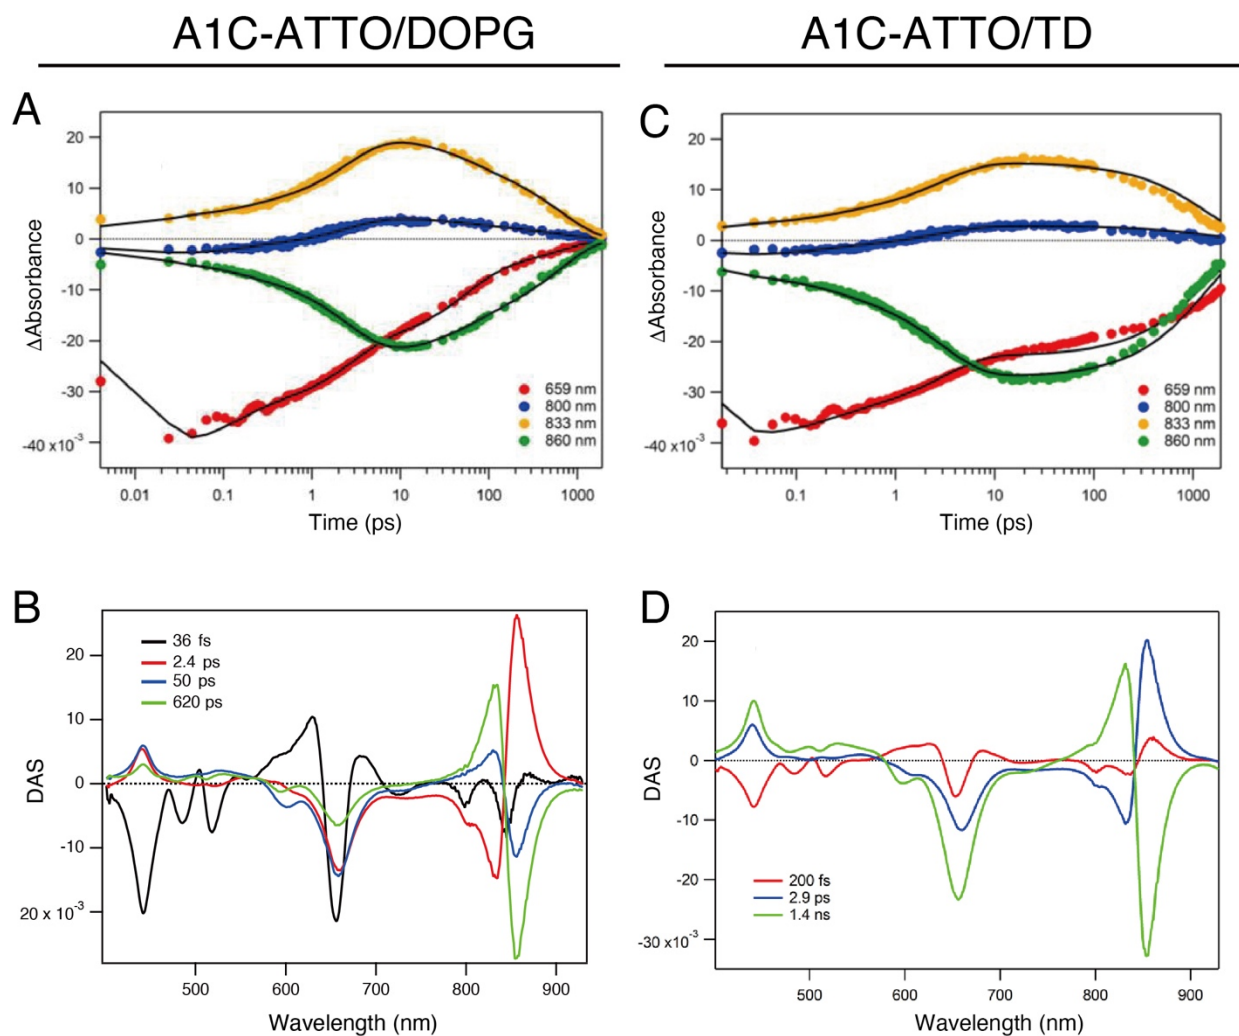

**Figure S12.** Time dependence of the  $\Delta$ Absorbance at four probe wavelengths with global fitting (A, C) and the corresponding decay-associated spectra (B, D) for A1C-ATTO/DOPG (A, B) and A1C-ATTO/TD (C, D). Excitation wavelength: 650 nm.

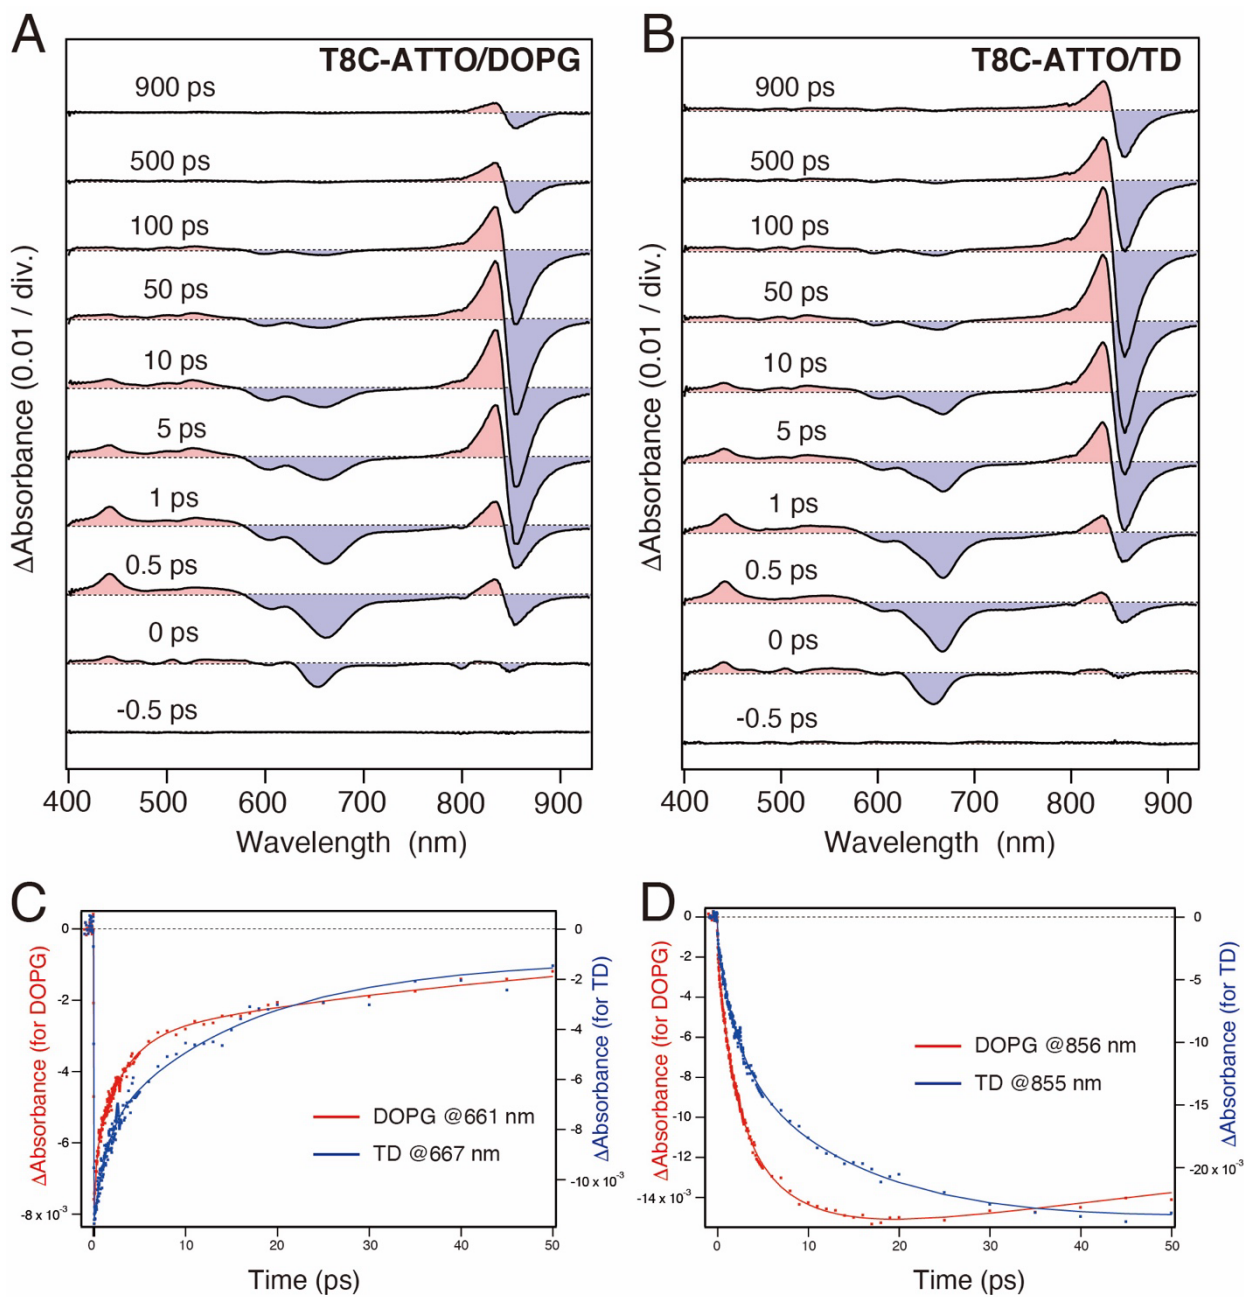

**Figure S13.** Transient absorption spectra of T8C-ATTO in DOPG-reconstituted (A, T8C-ATTO/DOPG) and detergent-solubilized (B, T8C-ATTO/TD) systems upon excitation at 650 nm. (C, D) Time dependence of  $\Delta$ Absorbance corresponding to ground state bleaching and stimulated emission of ATTO (C) and B850 (D) for the DOPG-reconstituted (red) and the detergent-solubilized (blue) systems.

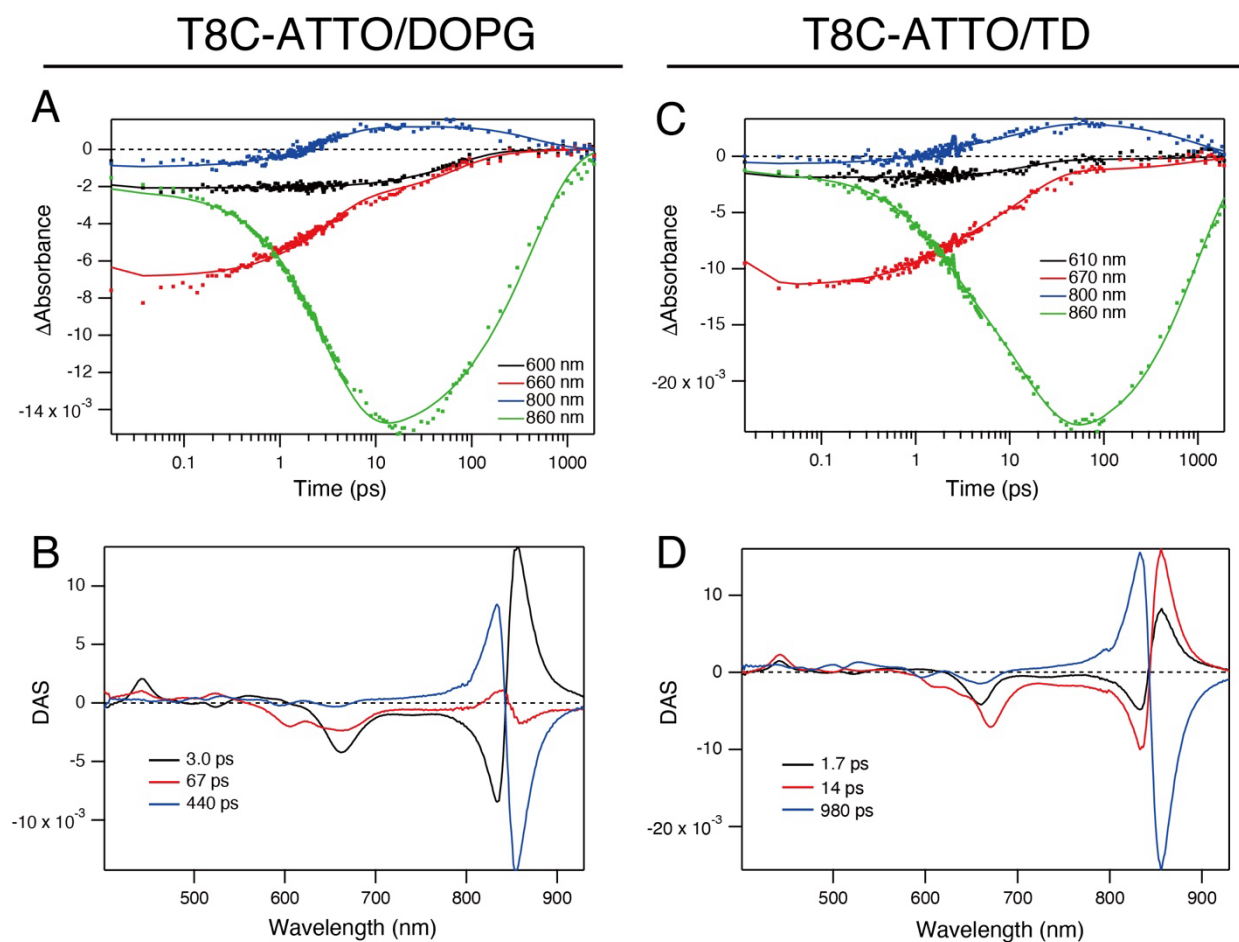

**Figure S14.** Time dependence of the  $\Delta$ Absorbance at four probe wavelengths with global fitting (A, C) and the corresponding decay-associated spectra (B, D) for T8C-ATTO/DOPG (A, B) and T8C-ATTO/TD (C, D). Excitation wavelength: 650 nm.

**Table S2.** Time constants obtained from Global Analysis for the biohybrid LH2s

| System                                | Time constant (ps) |      |     |
|---------------------------------------|--------------------|------|-----|
|                                       | A1C                | T5C  | T8C |
| DOPG-reconstituted<br>(Tris-HCl)      | 0.04               | 0.07 |     |
|                                       | 2.4                | 1.8  | 3   |
|                                       | 50                 | 48   | 67  |
|                                       | 620                | 370  | 440 |
| TD buffer<br>(Tris-HCl+ $\beta$ -DDM) | 0.2                | 0.33 | 1.7 |
|                                       | 2.9                | 3.5  | 14  |
|                                       | 1400               | 990  | 980 |

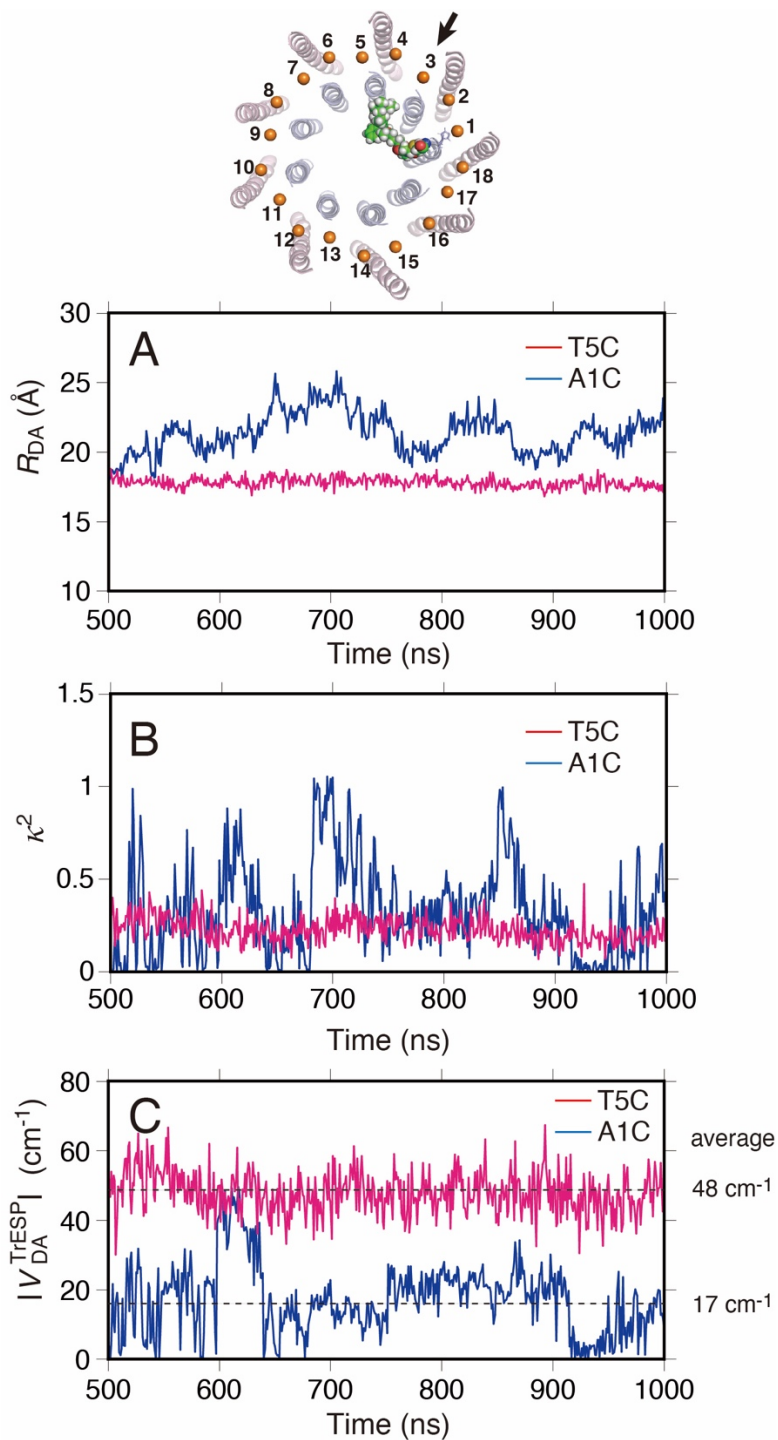

**Figure S15.** Donor–acceptor distance  $R_{DA}$  (A), orientation factor  $\kappa^2$  (B), and electronic coupling  $|V_{DA}^{TrESP}|$  (C) between ATTO and B850-BChl $a$  3 for T5C-ATTO and A1C-ATTO, plotted as a function of MD simulation time.

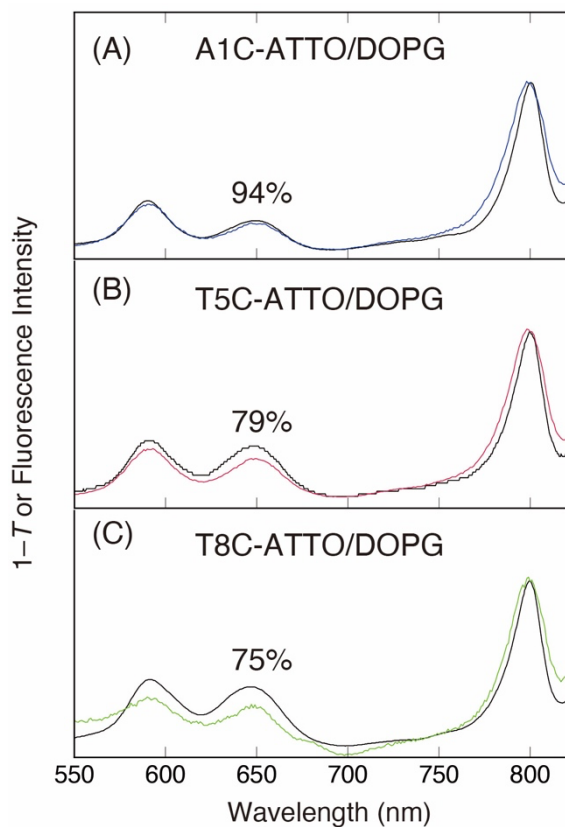

**Figure S16.** Fluorescence excitation spectra of A1C-ATTO/DOPG (A), T5C-ATTO/DOPG (B), and T8C-ATTO/DOPG (C) monitored at 880 nm. The excitation spectra (colored lines) were compared with absorbance ( $1 - T$ , T: transmittance) spectra (black lines), normalized at B800. The evaluated yields of energy transfer from ATTO to B850 are shown in the panels.
